# Supplementary material for: Dual Ultrasound and Photoacoustic Tracking of Magnetically Driven Micromotors: From In Vitro to In Vivo
Source: PubMed Central journal article supplement — Adv Healthc Mater. 2021 Aug 11;10(22):2101077. doi: 10.1002/adhm.202101077 (PMC11469181; doi:10.1002/adhm.202101077), 2021-08-11
Supplement: ADHM-10-2101077-s012.pdf [file ADHM-10-2101077-s012.pdf]

**ADVANCED  
HEALTHCARE  
MATERIALS**

Supporting Information

for *Adv. Healthcare Mater.*, DOI: 10.1002/adhm.202101077

Dual ultrasound and photoacoustic tracking of magnetically-driven micromotors: from in vitro to in vivo

*Azaam Aziz, Joost Holthof, Sandra Meyer, Oliver G. Schmidt and Mariana Medina-Sánchez\**

## Supporting Information

**Dual ultrasound and photoacoustic tracking of magnetically-driven micromotors: from in vitro to in vivo**

*Azaam Aziz, Joost Holthof, Sandra Meyer, Oliver G. Schmidt and Mariana Medina-Sánchez\**

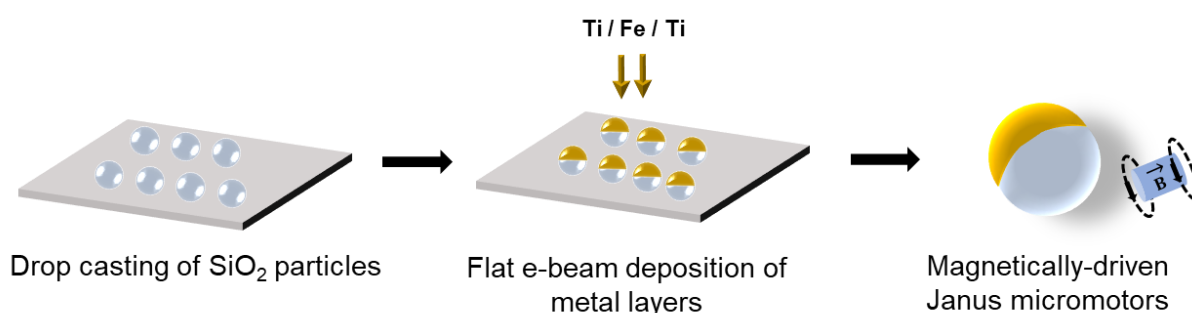

**Figure S1.** Fabrication of the magnetically-driven micromotors. A monolayer of SiO<sub>2</sub> particles ( $\varnothing = 100 \mu\text{m}$ ) is drop-casted on a glass slide and dried at room temperature. Afterward, thin metal layers (10 nm Ti, 50 nm Fe and 10 nm Ti) are deposited using an electron beam evaporator.

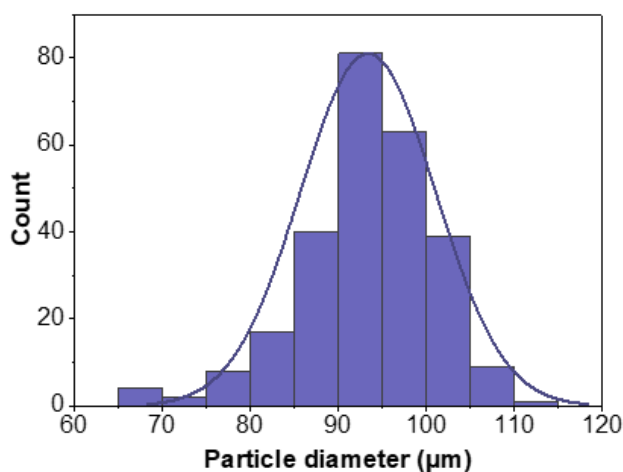

**Figure S2.** The particle size distribution histogram of SiO<sub>2</sub> microparticles with mean diameter of  $93.30 \mu\text{m}$  ( $\text{SD} \pm 7.70 \mu\text{m}$ ).

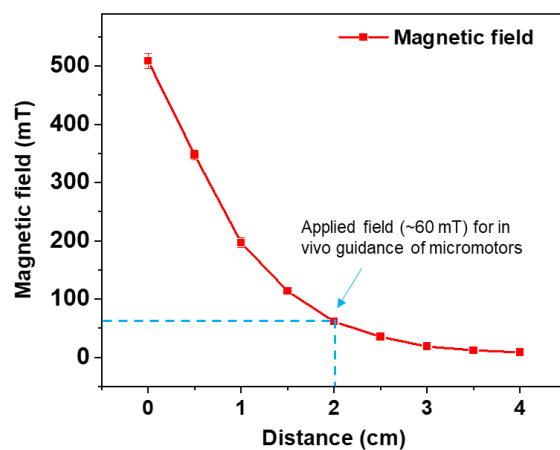

**Figure S3.** The magnetic field strength of an external hand-held magnet was measured using a Hall sensor from 0 to 4 cm distance.

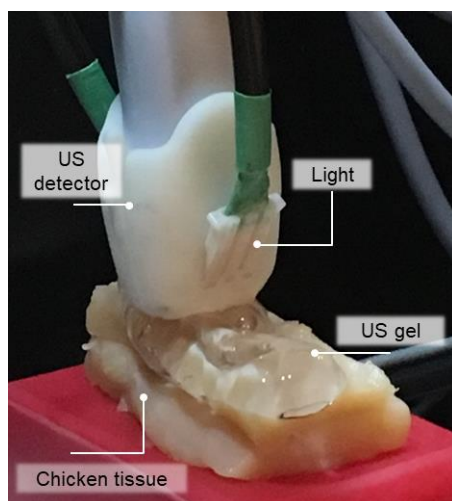

**Figure S4.** The micromotors are inserted in IPU tubing which is then sandwiched between two chicken breast tissues. The conventional US gel was applied between the acoustic transducer and the chicken surface for efficient acoustic coupling.

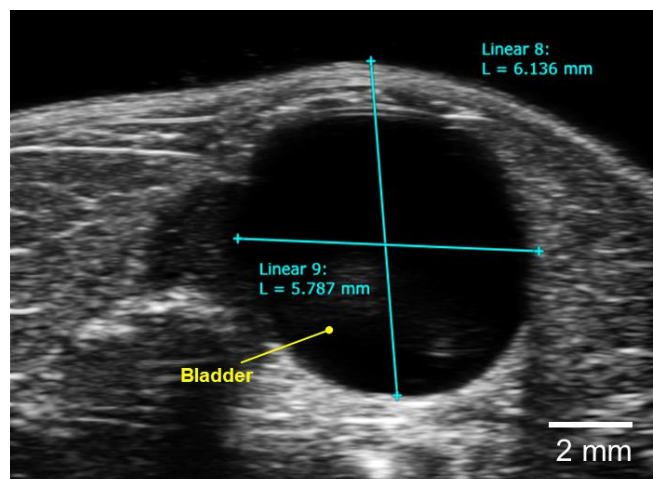

**Figure S5.** Dimensions of a bladder cavity of a 12-week-old mouse.

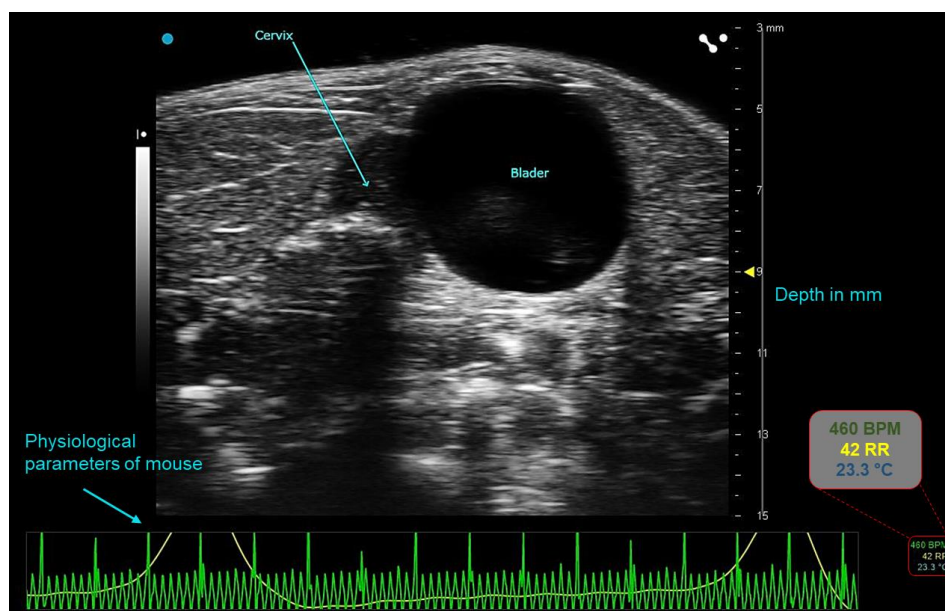

**Figure S6.** Physiological parameters of a mouse during the experiment. Beats per minute (BPM) (heart rate) and Respiratory rate (RR).

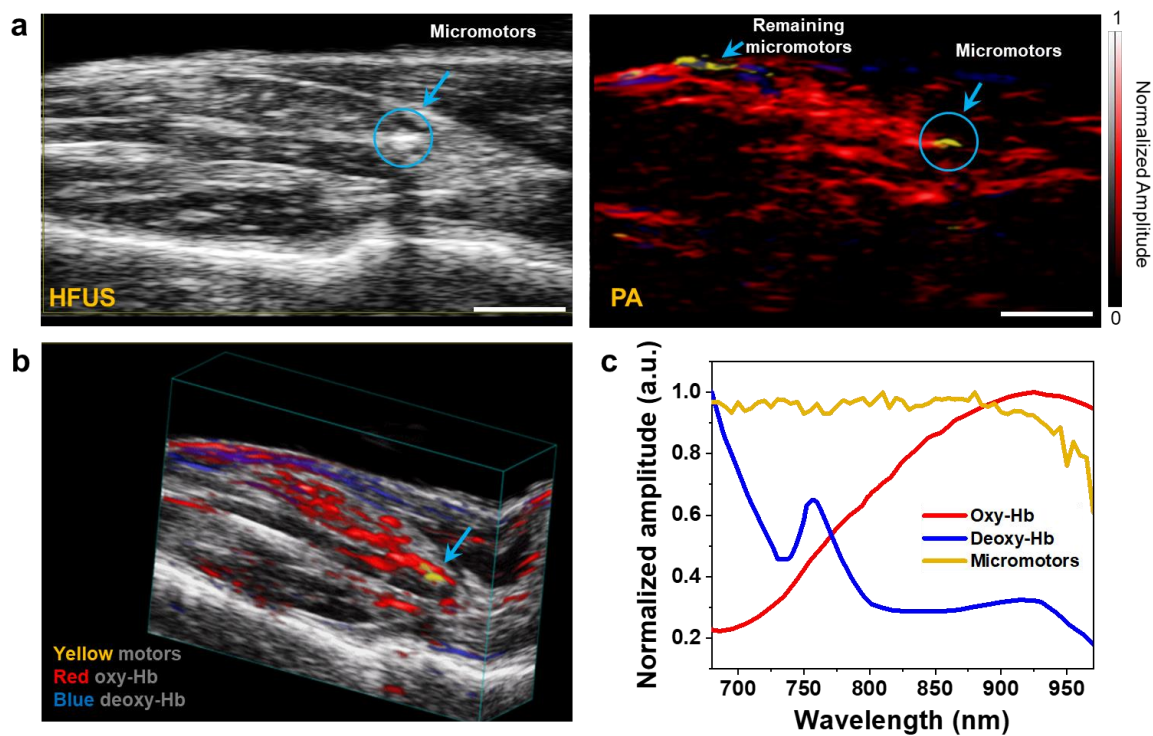

**Figure S7.** 3D multiplexing in vivo; a) Injection of micromotors into the mouse hind limb (popliteal lymph node fat pad) and HFUS and PA imaging of a swarm of micromotors (Yellow spot in PA mode shows the position of injected micromotors within tissue). The remaining micromotors from the syringe tip were also visible on the tissue top surface after taking it out. Scale bar: 2 mm. b) 3D reconstruction and spectral unmixing of the injected micromotors in tissue. c) PA signal strength of the injected micromotors (yellow), oxy (red), and deoxygenated (blue) hemoglobin.

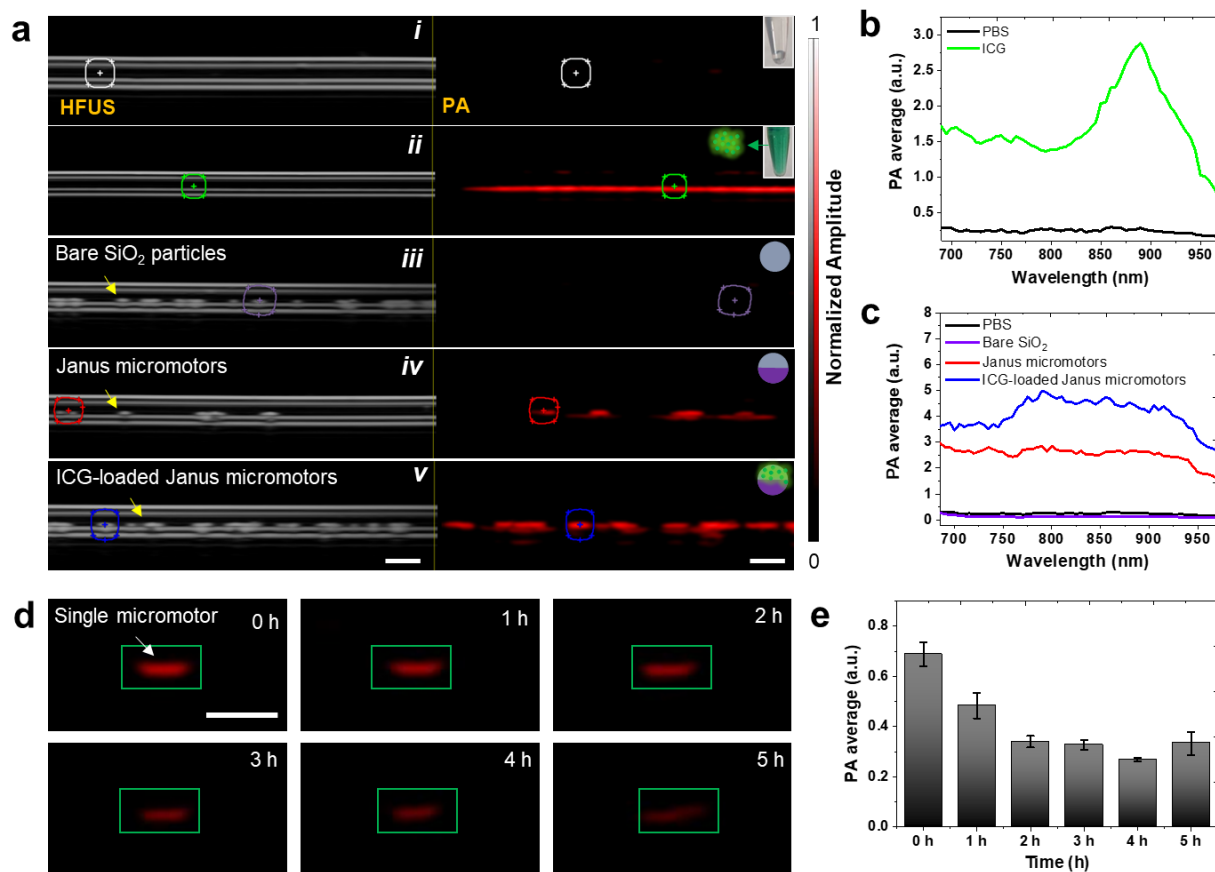

**Figure S8.** Preliminary study of ICG-loaded micromotors; a) HFUS and PA images of control (PBS) (i), ICG (ii), bare SiO<sub>2</sub> particles (iii), magnetic micromotors (iv), and ICG-labelled micromotors (v). Scale bar: 1 mm. b) PA spectral signal showing a distinct absorption peak at around 880 nm (green curve) of ICG when compared to the signal obtained from PBS. c) PA absorption spectrum of PBS, bare SiO<sub>2</sub>, magnetic micromotor, and ICG-loaded micromotors. A comparable ROI was measured in each scenario where a single or few static micromotors were located. d) ICG- loaded single micromotors were monitored over 5 h to observe the release of ICG over time. Scale bar: 1 mm. e) PA signal intensity showing the decrease of ICG signal over 5 h.

**Table S1.** Imaging parameters for Hybrid HFUS and PA system implemented in this study.

| <b>Hybrid HFUS and PA system</b> |                                    |                        |                                       |
|----------------------------------|------------------------------------|------------------------|---------------------------------------|
| <b>Static imaging</b>            |                                    | <b>Dynamic imaging</b> |                                       |
| Wavelength (nm)                  | 680-970 nm                         | Wavelength (nm)        | 800 nm                                |
| Frequency (MHz)                  | 21 MHz                             | Frequency (MHz)        | 21 MHz                                |
| Detector elements                | 256                                | Detector elements      | 256                                   |
| Axial resolution                 | 75 $\mu\text{m}$                   | Axial resolution       | 75 $\mu\text{m}$                      |
| NA                               |                                    | Temporal resolution    | US (max.320 fps) /<br>PA (5-20 fps)   |
| Penetration depth                | ~1 cm (ex vivo)<br>~2 cm (in vivo) | Penetration depth      | ~2 cm (in mice<br>bladder and uterus) |
